# Supplementary material
Source: Research Square preprint supplement (doi:10.21203/rs.3.rs-9481537/v1)
Supplement: Supplementary file 1 [file 00a642891f8715f7df336628.docx]

**Supplement**

**Figure S1.** **CUSUM analysis of the initial 200 cases.** (A)Total operative time (=0.9141) and (B) Console time (=0.9072), fitted with 5th-order regression. Both curves exhibit a single peak followed by a continuous decline, failing to reveal the "Plateau Trap" or a definitive plateau phase.





**Figure S2. Comparison of perioperative outcomes across three phases.** The violin plots depict the distribution of (A) Console time, (B) Estimated blood loss, (C) Chest tube duration, and (D) Length of stay (LOS). Internal box plots indicate the median (thick horizontal line) and interquartile range (white box).





**Table S1.** Comparison of clinicopathologic characteristics between different phases, n(%).

| **Characteristics** | **Total (N = 300)** | **Learning (N = 81)** | **Plateau (n = 56)** | **Mastery (n = 163)** | ***P*** |  |  |
| --- | --- | --- | --- | --- | --- | --- | --- |
| Tumor size, Mean ± SD | 2.4 ± 1.3 | 2.4 ± 0.9 | 2.2 ± 1.0 | 2.4 ± 1.6 | 0.424 | 0.241 | 0.230 |
| Age, n(%) |  |  |  |  | 0.919 | 0.793 | 0.951 |
| ≤60 | 165 (55.0) | 43 (53.1) | 31 (55.4) | 91 (55.8) |  |  |  |
| ˃60 | 135 (45.0) | 38 (46.9) | 25 (44.6) | 72 (44.2) |  |  |  |
| , n(%) |  |  |  |  | 0.378 | 0.718 | 0.220 |
| <25 | 214 (71.3) | 60 (74.1) | 43 (76.8) | 110 (68.1) |  |  |  |
| ≥25 | 86 (28.7) | 21 (25.9) | 13 (23.2) | 52 (31.9) |  |  |  |
| SEX, n(%) |  |  |  |  | 0.370 | 0.191 | 0.205 |
| Male | 143 (47.7) | 41 (50.6) | 22 (39.3) | 80 (49.1) |  |  |  |
| Female | 157 (52.3) | 40 (49.4) | 34 (60.7) | 83 (50.9) |  |  |  |
| Lesion Location, n(%) |  |  |  |  | 0.354 | 0.578 | 0.525 |
| RUL | 108 (36.0) | 34 (42.0) | 23 (41.1) | 51 (31.3) |  |  |  |
| RML | 47 (15.7) | 11 (13.6) | 10 (17.9) | 26 (15.9) |  |  |  |
| RLL | 41 (13.7) | 9 (11.1) | 5 (8.9) | 27 (16.6) |  |  |  |
| LUL | 73 (24.3) | 15 (18.5) | 14 (25.0) | 44 (27.0) |  |  |  |
| LLL | 31 (10.3) | 12 (14.8) | 4 (7.1) | 15 (9.2) |  |  |  |
| Neoadjuvant therapy, n(%) |  |  |  |  | 0.774 | 1.000 | 1.000 |
| No | 289 (96.3) | 77 (95.1) | 54 (96.4) | 158 (96.9) |  |  |  |
| Yes | 11 (3.7) | 4 (4.9) | 2 (3.6) | 5 (3.1) |  |  |  |
| Clinical stage, n(%) |  |  |  |  | 0.104 | 0.312 | 0.055 |
| I | 250 (83.3) | 69 (85.2) | 53 (94.6) | 128 (78.5) |  |  |  |
| II | 25 (8.3) | 4 (4.9) | 2 (3.6) | 19 (11.7) |  |  |  |
| III | 21 (7.0) | 6 (7.4) | 1 (1.8) | 14 (8.6) |  |  |  |
|  | 4 (1.3) | 2 (2.5) | 0 (0.00) | 2 (1.2) |  |  |  |
| Anatomic type, n(%) |  |  |  |  | 0.381 | 1.000 | 0.326 |
| Central | 7 (2.3) | 1 (1.2) | 0 (0.0) | 6 (3.7) |  |  |  |
| Peripheral | 293 (97.7) | 80 (98.8) | 56 (100.0) | 157 (96.3) |  |  |  |
| Comorbidity, n(%) |  |  |  |  | 0.018 | 0.007 | 0.259 |
| No | 167 (55.7) | 55 (67.9) | 25 (44.6) | 87 (53.4) |  |  |  |
| Yes | 133 (44.4) | 26 (32.1) | 31 (55.4) | 76 (46.6) |  |  |  |
| Smoking History, n(%) |  |  |  |  | 0.796 | 0.504 | 0.704 |
| Never | 211 (70.3) | 55 (67.9) | 41 (73.2) | 115 (70.6) |  |  |  |
| Yes | 89 (29.7) | 26 (32.1) | 15 (26.8) | 48 (29.4) |  |  |  |
| Intrapleural adhesions, n(%) |  |  |  |  | 0.604 | 0.318 | 0.425 |
| No | 244 (81.3) | 64 (79.0) | 48 (85.7) | 132 (81.0) |  |  |  |
| Yes | 56 (18.7) | 17 (21.0) | 8 (14.3) | 31 (19.0) |  |  |  |
| Pathological Classification, n(%) |  |  |  |  | 0.710 | 0.937 | 0.436 |
| Adenocarcinoma | 271 (90.3) | 72 (88.9) | 52 (92.9) | 147 (90.2) |  |  |  |
| Squamous cell carcinoma | 19 (6.3) | 5 (6.2) | 2 (3.6) | 12 (7.4) |  |  |  |
| Neuroendocrine carcinoma | 7 (2.3) | 3 (3.70) | 2 (3.6) | 2 (1.2) |  |  |  |
|  | 3 (1.0) | 1 (1.2) | 0 (0.0) | 2 (1.2) |  |  |  |
| , n(%) |  |  |  |  | 0.337 | 0.162 | 0.498 |
| pCR | 1 (0.3) | 0 (0.0) | 0 (0.0) | 1 (0.6) |  |  |  |
| I | 236 (78.7) | 61 (75.3) | 49 (87.5) | 126 (77.3) |  |  |  |
| II | 23 (7.7) | 5 (6.2) | 4 (7.1) | 14 (8.6) |  |  |  |
| III | 36 (12.0) | 12 (14.8) | 3 (5.4) | 21 (12.9) |  |  |  |
| IV | 4 (1.3) | 3 (3.7) | 0 (0.0) | 1 (0.6) |  |  |  |
| Abbreviations: LLL, left lower lobe; LNs, lymph nodes.; LUL, left upper lobe; RLL,right lower lobe; RML, right middle lobe; RUL, right upper lobe; SD, standard deviation; IQR, inter quartile range. | | | | | | | |
| 1. Comparison between the learning phase and plateau phase. 2. Comparison between the plateau phase and mastery phase. 3. According to the WHO criteria for overweight, BMI was categorized into two groups: ≥25 and <25 4. Two cases with solitary brain metastasis received brain irradiation before lobectomy. One case was suspected to have stage IV based on the presence of multiple pulmonary nodules in both lungs. 5. Others contain pulmonary sarcomatoid carcinoma(1), Large cell carcinoma(1), pulmonary mucoepidermoid carcinoma(1). 6. Two cases with solitary brain metastasis received brain irradiation before lobectomy. Pleural dissemination was found during surgery in one case. Pericardium and chest wall were found to be involved in one case. | | | | | | | |
|  | | | | | | | |
